# Supplementary material for: Rapid detection of furanyl fentanyl in complex matrices using Leidenfrost desorption-assisted low-temperature arc plasma ionization mass spectrometry
Source: Royal Society of Chemistry journal article supplement (doi:10.1039/d4an00222a), 2024-01-01
Supplement: d4an00222a1.pdf [file d4an00222a1.pdf]

*Supporting information*

# Rapid Detection of Furanyl Fentanyl in Complex Matrices Using Leidenfrost Desorption-Assisted Low-Temperature Arc Plasma Ionization Mass Spectrometry

Wei Zhang<sup>1a</sup>, Zhongbao Han<sup>1,2a</sup>, Zhongyu Zhao<sup>1</sup>, Jianjun Shi<sup>1</sup>, Liyan Liu<sup>1</sup>, Dan Wang<sup>3\*</sup>, Zhan Yu<sup>1\*</sup>

1. *College of Chemistry and Chemical Engineering, Shenyang Normal University, Shenyang 110034, Liaoning, China*
2. *Faculty of Engineering, University of Yamanashi, 4-3-11, Takeda, Kofu, Yamanashi, 400-8511 Japan*
3. *School of Narcotics Control and Public Order Studies, Criminal Investigation Police University of China, Shenyang 110854, Liaoning, China*

**\*To whom correspondence should be addressed:**

D.Wang, E-mail: wangdan\_jdxx@cipuc.edu.cn, Phone: +86-24-86982240

Z. Yu, E-mail: yuzhan@synu.edu.cn, Phone: +86-24-86577124

**a These authors contributed equally to this work.**

**Keywords:** Leidenfrost desorption; Furanyl fentanyl; Low-temperature arc plasma ionization; Mass spectrometry

## Table of Contents

| <b>Figure</b> | <b>Description</b>                                             | <b>Page</b> |
|---------------|----------------------------------------------------------------|-------------|
| Figure S1     | Furanyl Fentanyl Structural Formula                            | S-1         |
| Figure S2     | Mass Spectrum of Furanyl Fentanyl in Aqueous Solution          | S-2         |
| Figure S3     | Microscopic Inspection of Leidenfrost Desorption               | S-3         |
| Figure S4     | Mass Spectra of Furanyl Fentanyl in Different Complex Matrices | S-4         |

**Figure S1: Furanyl Fentanyl Structural Formula**

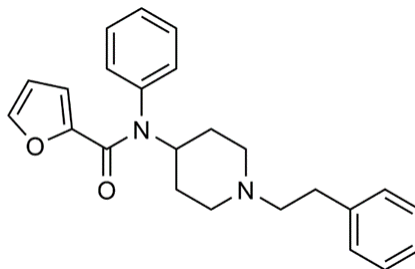

Figure S1. Furanyl fentanyl structural formula (MW = 374.19)

**Figure S2: Mass Spectrum of Furanyl Fentanyl in Aqueous Solution**

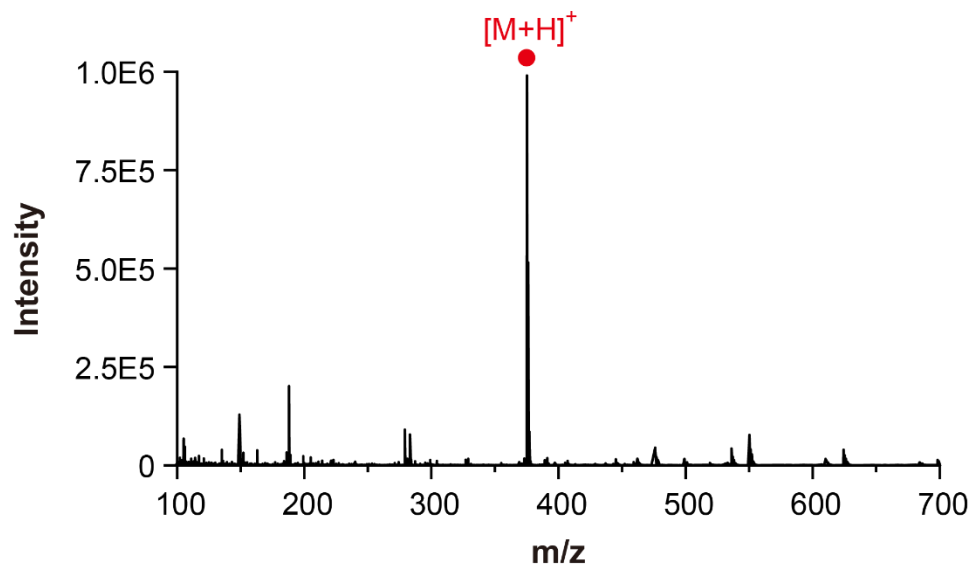

Figure S2. Mass spectrum of furanyl fentanyl (3 $\mu$ g/mL) in aqueous solution

**Figure S3: Microscopic Inspection of Leidenfrost Desorption**

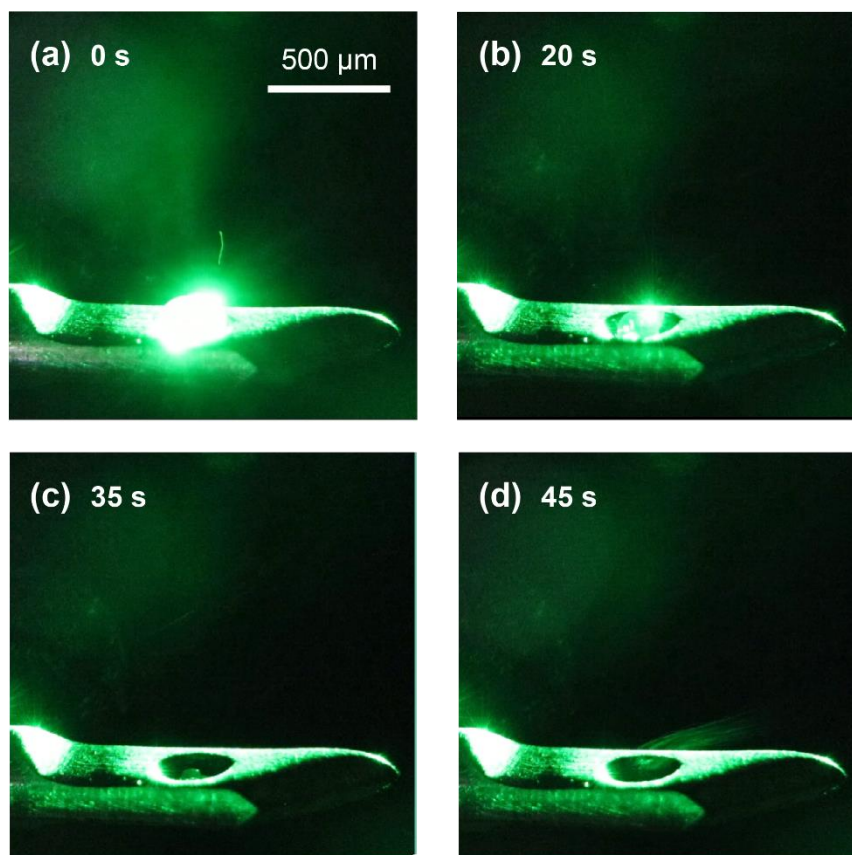

Figure S3. Microscopic inspection of the Leidenfrost desorption with 5  $\mu\text{L}$  of pure water droplets in the 420  $^{\circ}\text{C}$  heater. The images were taken at different time points using laser illumination. (a) 0 s, (b) 20 s, (c) 35 s, (d) 45 s. The moment when the droplet was initially injected into the heater groove is defined as the initial time.

**Figure S4: Mass Spectra of Furanyl Fentanyl in Different Complex Matrix Solutions**

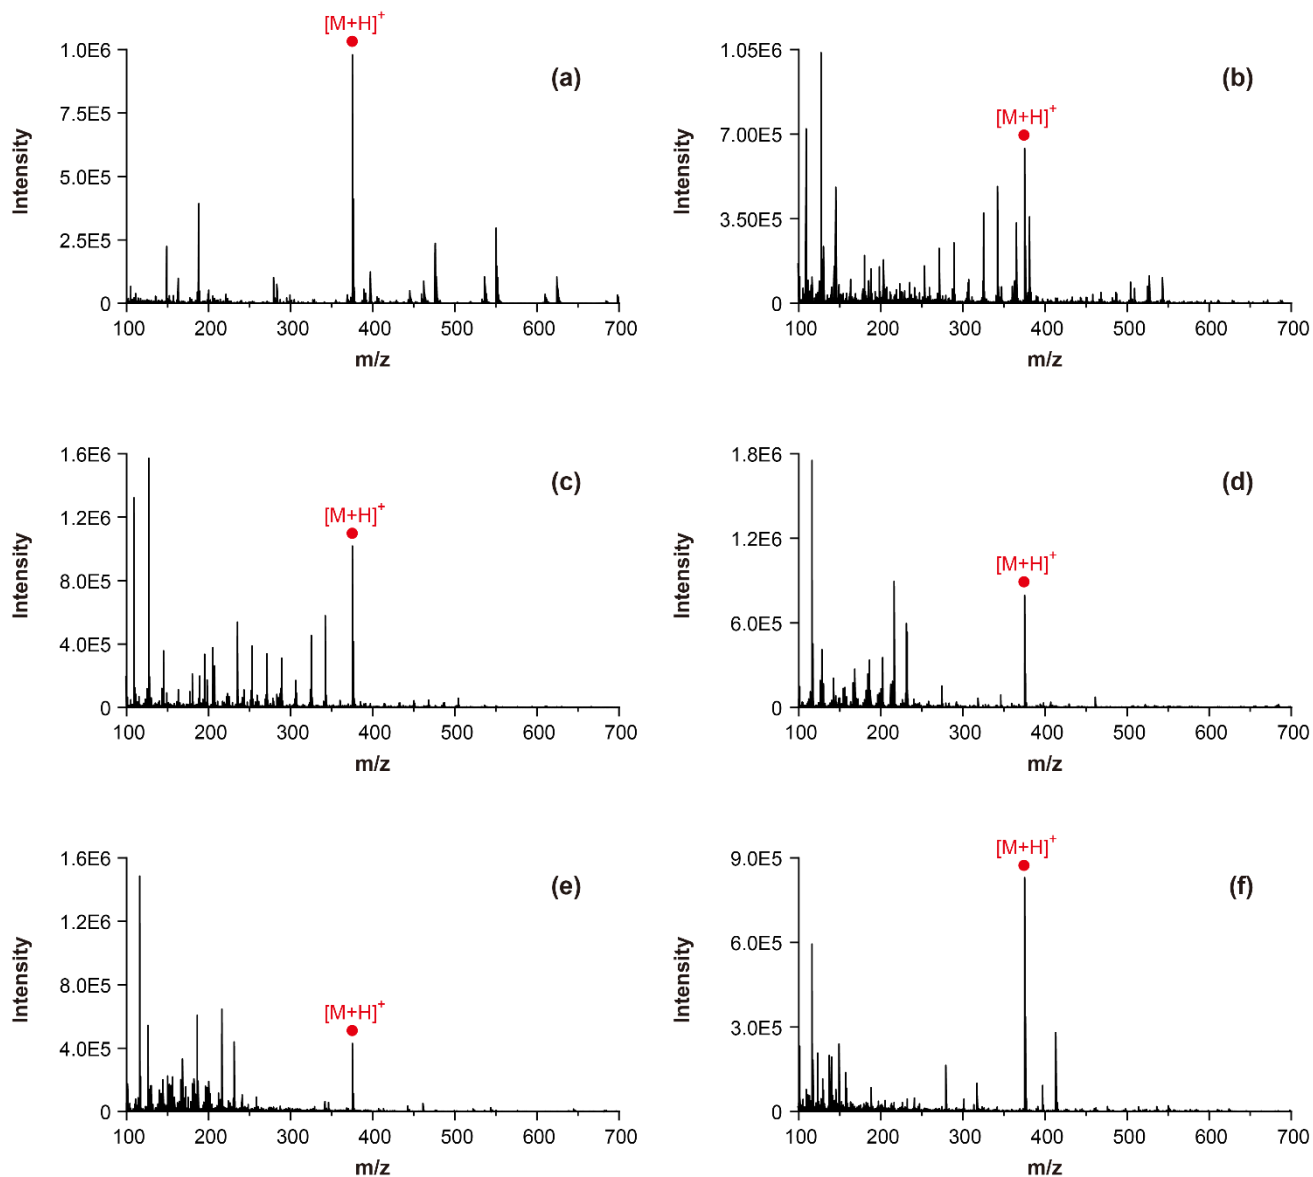

Figure S4. Mass spectra of furanyl fentanyl in (a) lake water, (b) Master Kong Fresh juice, (c) Coca-Cola, (d) Great Wall Dry Red wine, (e) Great Wall Five-Star wine, and (f) Sangou Laojiao liquor. The complex matrix solutions were diluted with pure water at a 1/1 v/v. Furanyl fentanyl concentration: 3 $\mu$ g/mL for (a), (b), and (c), 2 $\mu$ g/mL for (d), (e), and (f).
